# Supplementary material for: C/EBPβ Is a Transcriptional Regulator of Wee1 at the G2/M Phase of the Cell Cycle
Source: PubMed Central journal article supplement (PMC6407104; doi:10.3390/cells8020145), 2019-02-11
Supplement: cells-08-00145-s001.pdf [file cells-08-00145-s001.pdf]

## Supplementary Materials

### Methods

#### FACS Analysis of Mitotic Cells

To detect mitotic cells, cells were fixed in ice-cold methanol for 16 h, then incubated with phospho-Histone H3 (Ser10) (1:500, ab14955, Abcam, Cambridge, UK) for 1 h at room temperature (RT). After washing with 1% bovine serum albumin in phosphate-buffered saline, cells were stained with fluorescein-5-isothiocyanate (FITC)-conjugated secondary antibody for 30 min at RT and DNA was stained with propidium iodide (PI). Finally, samples were analyzed by flow cytometry (FACSCaliber; Becton Dickinson, Franklin Lakes, NJ, USA).

**Figure S1. Expression and gene alteration of C/EBP $\beta$  in human lung cancers**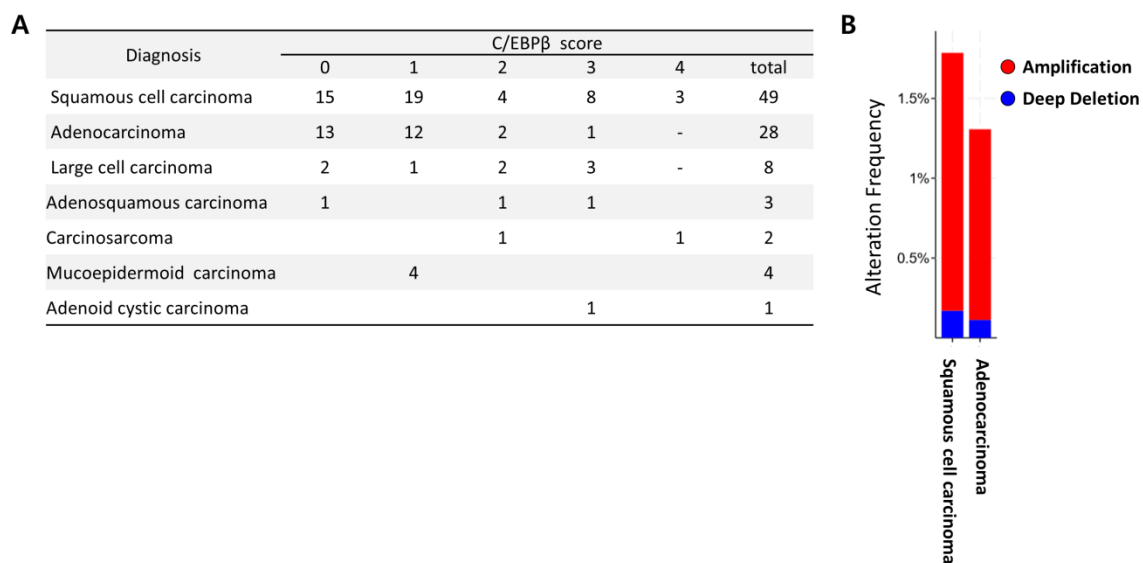

(A) Detailed score of C/EBP $\beta$  expression in NSCLC patient tissues. (B) The alterations of C/EBP $\beta$  gene were analyzed using cBioPortal Cancer Genomics [1, 2]. C/EBP $\beta$  gene is altered in 1.74% (amplification 1.57% and deep deletion 0.17%) of squamous cell carcinoma and in 1.32% (amplification 1.22% and deep deletion 0.1%) of adenocarcinoma.

**Figure S2. Overall survival (OS) and post-progression survival (PPS) of lung cancer patients**

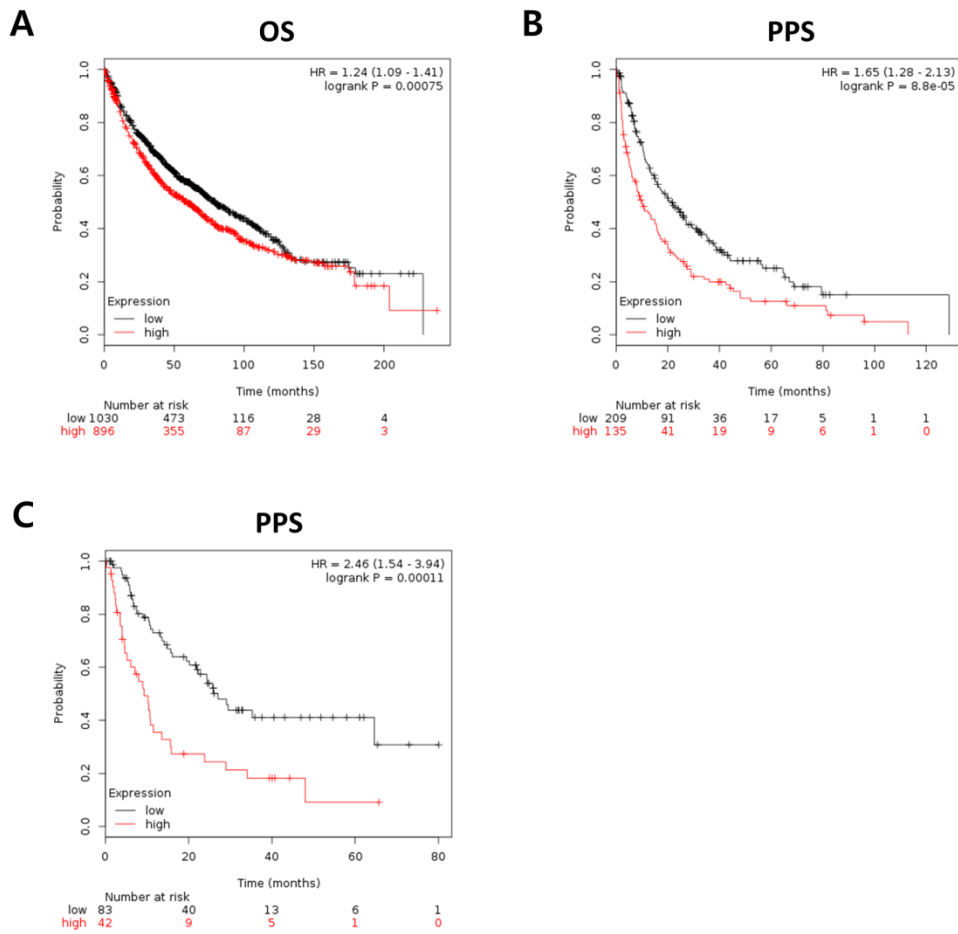

The association between C/EBP $\beta$  mRNA expression and (A) OS, (B) PPS of total lung cancer patients or (C) PPS of adenocarcinoma patients was analyzed using the Kaplan-Meier Plotter [3]. Kaplan-Meier analysis was performed in whole dataset.

**Table S1. Histological Subtypes and gene mutation status of NSCLC cell lines.**

| Cell line | Histological type               | EGFR mutation | KRAS mutation | Reference |
|-----------|---------------------------------|---------------|---------------|-----------|
| A549      | Adenocarcinoma (AC)             | WT            | G12S          | [4]       |
| Calu-6    | Anaplastic carcinoma            | WT            | Q61H          | [5]       |
| H1299     | Large cell carcinoma            | WT            | WT/NRAS Q61K  | [4]       |
| H1703     | Adenocarcinoma                  | WT            | WT            | [4]       |
| H1975     | Adenocarcinoma                  | L858R, T790M  | WT            | [5]       |
| H23       | Adenocarcinoma                  | WT            | G12C          | [4]       |
| H460      | Large cell carcinoma            | WT            | Q61H          | [4]       |
| HCC2279   | Adeno-squamous cell carcinoma   | delE746-A750  | WT            | [6]       |
| H522      | Adenocarcinoma                  | WT            | WT            | [4]       |
| A427      | Adenocarcinoma                  | WT            | G12D          | [4]       |
| Calu-3    | Adenocarcinoma                  | WT            | WT            | [5]       |
| H358      | Bronchioalveolar Carcinoma (AC) | WT            | G12C          | [4]       |
| HCC827    | Adenocarcinoma                  | delE746-A750  | WT            | [7]       |
| HCC95     | Squamous cell carcinoma         | WT            | WT            | [4]       |
| HCC1588   | Squamous cell carcinoma         | WT            | WT            | [6, 8]    |

**Figure S3. FACS analysis of mitotic cells using mitotic marker, phospho-Histone H3 (Ser 10).**

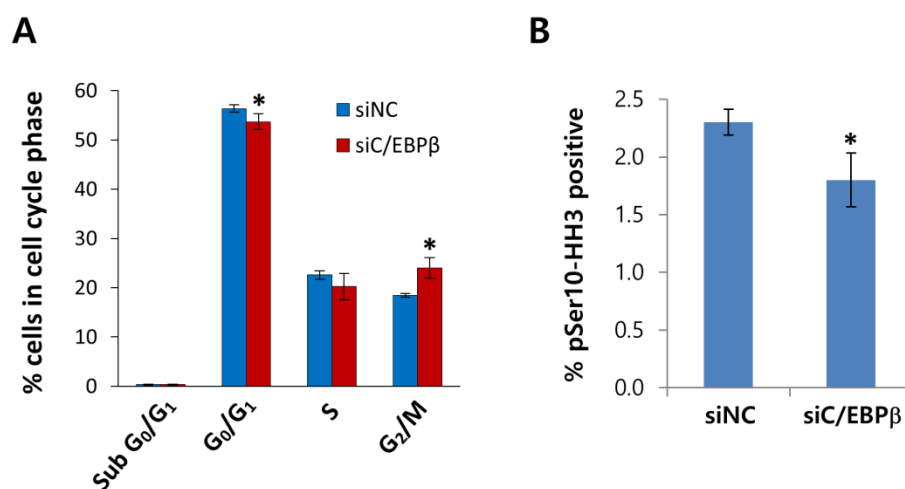

Cells were fixed 48 h after siRNA transfection and stained with anti-phospho-histone H3 (Ser10) to detect mitotic cells and PI for DNA content. A. Populations of each cell cycle of control and C/EBP $\beta$ -knockdown cells are shown. B. Mitotic populations of control and C/EBP $\beta$ -knockdown cells are shown. Data are presented as mean  $\pm$  SD. Statistical significance was determined using the *t*-test, \*  $p < 0.05$ .

## References

1. Cerami, E.; Gao, J.; Dogrusoz, U.; Gross, B. E.; Sumer, S. O.; Aksoy, B. A.; Jacobsen, A.; Byrne, C. J.; Heuer, M. L.; Larsson, E.; Antipin, Y.; Reva, B.; Goldberg, A. P.; Sander, C.; Schultz, N., The cBio cancer genomics portal: an open platform for exploring multidimensional cancer genomics data. *Cancer Discov* **2012**, *2* (5), 401-4.
2. Gao, J.; Aksoy, B. A.; Dogrusoz, U.; Dresdner, G.; Gross, B.; Sumer, S. O.; Sun, Y.; Jacobsen, A.; Sinha, R.; Larsson, E.; Cerami, E.; Sander, C.; Schultz, N., Integrative analysis of complex cancer genomics and clinical profiles using the cBioPortal. *Sci Signal* **2013**, *6* (269), p11.
3. Gyorfyy, B.; Surowiak, P.; Budczies, J.; Lanczky, A., Online survival analysis software to assess the prognostic value of biomarkers using transcriptomic data in non-small-cell lung cancer. *PLoS one* **2013**, *8* (12), e82241.
4. Blanco, R.; Iwakawa, R.; Tang, M.; Kohno, T.; Angulo, B.; Pio, R.; Montuenga, L. M.; Minna, J. D.; Yokota, J.; Sanchez-Cespedes, M., A gene-alteration profile of human lung cancer cell lines. *Human mutation* **2009**, *30* (8), 1199-206.
5. Forbes, S.; Clements, J.; Dawson, E.; Bamford, S.; Webb, T.; Dogan, A.; Flanagan, A.; Teague, J.; Wooster, R.; Futreal, P. A.; Stratton, M. R., COSMIC 2005. *British journal of cancer* **2006**, *94* (2), 318-22.
6. Wistuba, II; Bryant, D.; Behrens, C.; Milchgrub, S.; Virmani, A. K.; Ashfaq, R.; Minna, J. D.; Gazdar, A. F., Comparison of features of human lung cancer cell lines and their corresponding tumors. *Clinical cancer research : an official journal of the American Association for Cancer Research* **1999**, *5* (5), 991-1000.
7. Alvarez, J. V.; Greulich, H.; Sellers, W. R.; Meyerson, M.; Frank, D. A., Signal transducer and activator of transcription 3 is required for the oncogenic effects of non-small-cell lung cancer-associated mutations of the epidermal growth factor receptor. *Cancer research* **2006**, *66* (6), 3162-8.
8. Yamamoto, H.; Shigematsu, H.; Nomura, M.; Lockwood, W. W.; Sato, M.; Okumura, N.; Soh, J.; Suzuki, M.; Wistuba, II; Fong, K. M.; Lee, H.; Toyooka, S.; Date, H.; Lam, W. L.; Minna, J. D.; Gazdar, A. F., PIK3CA mutations and copy number gains in human lung cancers. *Cancer research* **2008**, *68* (17), 6913-21.
